# Supplementary material
Source: PubMed Central journal article supplement (PMC3519985)
Supplement: mt2012152x6.pdf [file mt2012152x6.pdf]

## Supplementary material

**Table S1**

The lists of residues reported in the table have been calculated by running a simulation of GAA in the presence of 10 NAC molecules starting from random positions in the simulation box. The NAC-density maps on the protein surface were calculated using the program gridcount (*N. Michaud-Agrawal, E. J. Denning, T. B. Woolf, O. Beckstein. MDAnalysis: A Toolkit for the Analysis of Molecular Dynamics Simulations J. Comp. Chem. (2011). doi:10.1002/jcc.21787*). The residues in contact with NAC have been defined using surfaces of NAC with an isovalue of 1.3mol/l. The bold line indicates the site identified also in the flexibility analysis as a possible hotspot for stability regulation.

| <b>Contact Site</b> | <b>Residues</b>                                                                                |
|---------------------|------------------------------------------------------------------------------------------------|
| <b>1</b>            | ASP94, ARG37, GLN33, GLU468, LYS93, PRO92                                                      |
| <b>2</b>            | ARG120, GLN494                                                                                 |
| <b>3</b>            | ARG395, THR425, PRO424, ALA428, ARG394                                                         |
| <b>4</b>            | ARG324, TRY616, SER716, SER617, SER619, HIS326, PRO718, PRO719                                 |
| <b>5</b>            | SER74, ARG134, TYR79, PRO136, SER137, SER141, GLU143, GLN156, ASP158                           |
| <b>6</b>            | ASN583, GLY582, THR584, PHE580, LEU581                                                         |
| <b>7</b>            | GLN52, GLY50, TRP57                                                                            |
| <b>8</b>            | SER311, SER310, GLN317, LEU609, LEU608, ALA313, ILE314                                         |
| <b>9</b>            | ASN813, ARG812                                                                                 |
| <b>10</b>           | THR737, LEU738, GLN734, SER731, ILE729, GLU732, THR702, LYS864, THR863, LYS780, GLU783, CYS883 |
| <b>11</b>           | GLN46, LYS45, ARG5                                                                             |
| <b>12</b>           | GLN55, PRO56, ARG20, VAL15, ASP14, TYR41, PRO16, PRO17                                         |
| <b>13</b>           | <b>LEU799, GLU800, ARG801, GLY802, ALA803, TYR804</b>                                          |
| <b>14</b>           | SER619, ARG37, GLN33, GLU468, LYS93, PRO92                                                     |
