# Supplementary material
Source: PubMed Central journal article supplement (PMC3519985)
Supplement: mt2012152x7.pdf [file mt2012152x7.pdf]

**Table S2**

Grid Docking scores of acetylated compounds to the allosteric site, and of DNJ to the active site.

| <b>Molecule</b> | <b>Score</b> | <b>Site</b> |
|-----------------|--------------|-------------|
| NAC             | -4,3342      | Allosteric  |
| NAG             | -4,0682      | Allosteric  |
| NAS             | -4,4576      | Allosteric  |
| MAL             | -4,9417      | Active Site |
| DNJ             | -6,6378      | Active Site |
